# Supplementary material
Source: HighWire-hosted journal article supplement (https://www.highwirestage.com/highwire/filestream/107592/field_highwire_adjunct_files/0/0959.pdf)
Supplement: 0959.pdf [file 0959.pdf]

## SUPPLEMENTARY MATERIAL

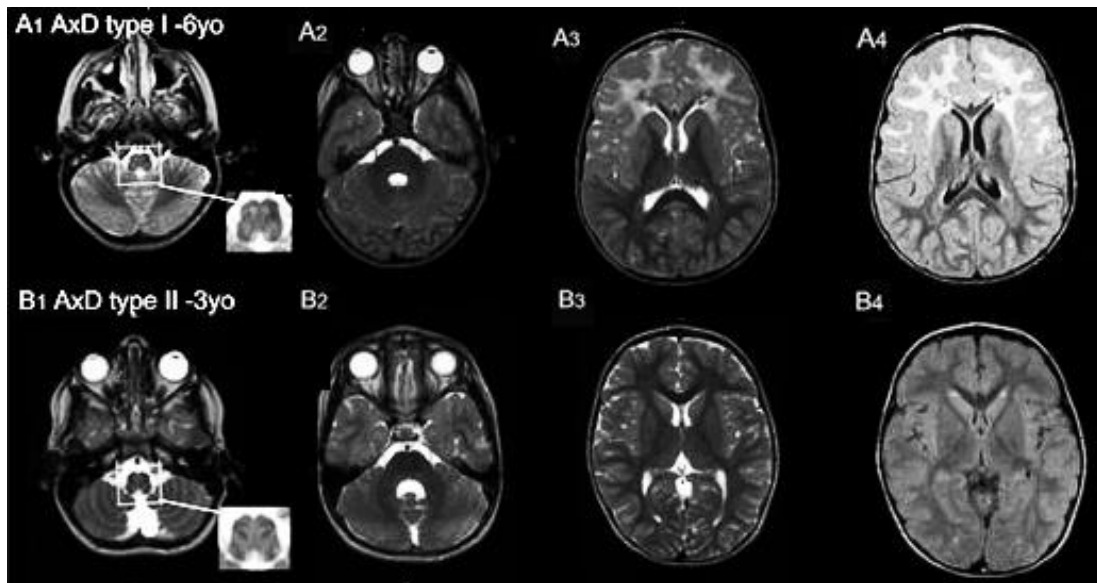

**Figure 1: Additional brain MRI features in subjects with AxD presenting the *Chipmunk sign*.**

A: Type I AxD, 6-year-old patient; B: type II AxD, 3-year-old patient. Brain axial T2WI (1,2,3).

Brain axial T2 FLAIR sequences for all subjects (4). *Chipmunk sign* in axial T2WI focused on the medulla oblongata (boxes in A<sub>1</sub>, B<sub>1</sub>). Typical frontal white matter involvement predominance in AxD type I (A<sub>3-4</sub>), in contrast with the AxD type II, that does not show supratentorial white matter involvement (B<sub>3-4</sub>).

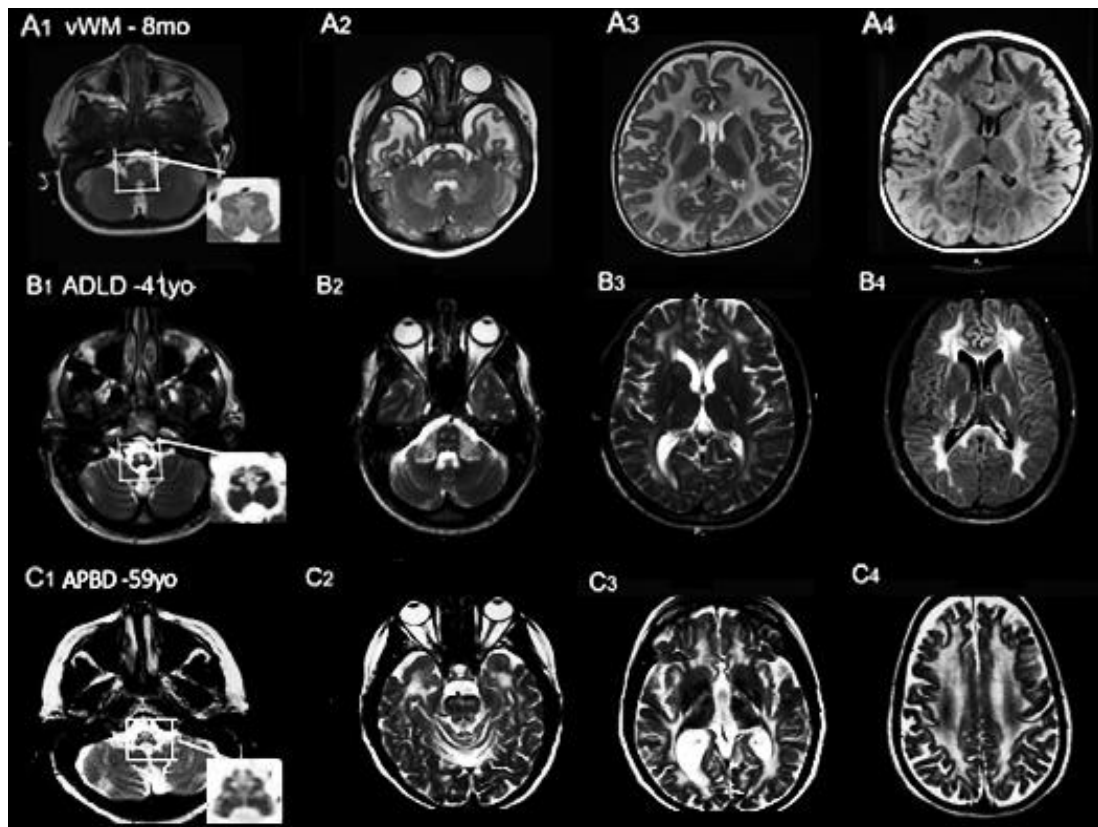

**Figure 2: Additional brain MRI features in subjects with other leukodystrophies presenting the *Chipmunk sign*.**

A: Vanishing White Matter (VWM), 8-month-old patient; B: Adult-onset autosomal dominant leukodystrophy (ADLD), 41-year-old patient; C: Adult Polyglucosan Body Disease (APBD), 59-year-old patient. *Chipmunk sign* in axial T2WI focused on the medulla oblongata (boxes in A<sub>1</sub>, B<sub>1</sub>, C<sub>1</sub>). Diffuse cerebral white matter involvement in VWM, ADLD and APBD (A<sub>3-4</sub>, B<sub>3-4</sub>, C<sub>3-4</sub>), with no evidence of disease gradient, unlike AxD. VWM shows white matter rarefaction (T2 FLAIR sequences A<sub>4</sub>), absent in other subjects (T2 FLAIR sequences B<sub>4</sub>, T2WI C<sub>4</sub>).

Table 1: Presence of the *Chipmunk Sign* in individuals diagnosed with non-AxD leukodystrophies and genetic leukoencephalopathies.

| Diagnosis         | <i>Chipmunk sign</i> |           | Total      |
|-------------------|----------------------|-----------|------------|
|                   | Absent               | Present   |            |
| 4H Leukodystrophy | 4                    | 1         | 5          |
| AARS              | 2                    | 0         | 2          |
| AARS2             | 1                    | 0         | 1          |
| ADLD              | 2                    | 1         | 3          |
| AGS               | 11                   | 0         | 11         |
| APBD              | <b>0</b>             | <b>4</b>  | <b>4</b>   |
| AxD               | <b>7</b>             | <b>48</b> | <b>55</b>  |
| Cockayne          | 3                    | 0         | 3          |
| DARS              | 5                    | 0         | 5          |
| EARS2             | 2                    | 0         | 2          |
| GM1               | 2                    | 0         | 2          |
| HABC              | 4                    | 0         | 4          |
| HDLS              | 1                    | 0         | 1          |
| Krabbe infantile  | 2                    | 0         | 2          |
| Krabbe juvenile   | 1                    | 0         | 1          |
| MCT8 deficiency   | 1                    | 0         | 1          |
| Mcomplex I        | 1                    | 0         | 1          |
| MLD               | 2                    | 0         | 2          |
| NDUFA2            | 1                    | 0         | 1          |
| NDUFS7            | 1                    | 0         | 1          |
| PEX5              | 1                    | 0         | 1          |
| PMD               | <b>2</b>             | <b>1</b>  | <b>3</b>   |
| POLG1             | 2                    | 0         | 2          |
| RMND1             | 2                    | 0         | 2          |
| SDH               | 4                    | 0         | 4          |
| SURF1             | 1                    | 0         | 1          |
| VWM               | <b>3</b>             | <b>3</b>  | <b>6</b>   |
| XALD              | 2                    | 0         | 2          |
| XALD_ao           | 1                    | 0         | 1          |
| <b>Total</b>      | <b>71</b>            | <b>58</b> | <b>129</b> |

4H: 4H Leukodystrophy; AARS: AARS-related leukoencephalopathy; AARS2: AARS2-related leukoencephalopathy; ADLD: Autosomal dominant leukodystrophy with autonomic disease, AGS: Aicardi-Goutieres Syndrome; APBD: Adult Polyglucosan Body Disease; AxD: Alexander Disease; Cockayne Syndrome; DARS: DARS-associated leukoencephalopathy; EARS2: Leukoencephalopathy with thalamus and brainstem involvement and high lactate; GM1: Gangliosidosis GM1; HABC: Hypomyelination with atrophy of Basal ganglia and Cerebellum; HDLS: Hereditary diffuse leukoencephalopathy with neuroaxonal spheroids; MCT8: MCT8 Deficiency; MComplex I: Mitochondrial Complex I deficiency; MLD: Metachromatic Leukodystrophy; NDUFA2: NDUFA2-related disorder; NDUFS7: NDUFS7-related leukoencephalopathy; PEX5: Peroxisome Biogenesis Factor 5 deficiency; PMD: Pelizaeus-Merzbacher Disease; POLG1: POLG1-related leukoencephalopathy; RMND1: RMND1-related leukoencephalopathy; SDH: Succinate Dehydrogenase deficiency; SURF1: SURF1-related leukoencephalopathy; VWM: Vanishing White Matter; XALD: X-linked Adrenoleukodystrophy.
